# Supplementary material for: Reversal of multidrug resistance in leukemia cells using a transferrin-modified nanomicelle encapsulating both doxorubicin and psoralen
Source: publisher site journal article supplement (doi:10.18632/aging.102992), 2020-04-07
Supplement: Supplementary file [file aging-v12i7-102992-supplementary-material-SD1.pdf]

## SUPPLEMENTARY TABLES

**Supplementary Table 1. Characterization of different drug combination. Results are expressed as mean  $\pm$  SD (n = 3–5).**

|              | <b>Particle Size (nm)</b> | <b>Drug loadings (DOX)%</b> | <b>% Entrapment</b> |
|--------------|---------------------------|-----------------------------|---------------------|
| M-Dox        | 78.1 $\pm$ 0.84           | 22.4                        | 75.3                |
| Tf-M-Dox     | 83.1 $\pm$ 0.67           | 20.4                        | 68.9                |
| Tf-M-Dox/PSO | 89.7 $\pm$ 0.73           | 19.2                        | 72.2                |

**Supplementary Table 2. Cytotoxicity of various DOX formulation on K562 and K562/DOX cells.**

|              | <b>IC50 (uM)</b> |                 |
|--------------|------------------|-----------------|
|              | <b>K562</b>      | <b>K562/DOX</b> |
| Dox          | 7.71 $\pm$ 1.42  | 27.1 $\pm$ 4.5  |
| M-Dox        | 6.67 $\pm$ 1.04  | 14.2 $\pm$ 2.3  |
| M-Dox/PSO    | 5.52 $\pm$ 0.81  | 6.98 $\pm$ 1.03 |
| Tf-M-Dox/PSO | 1.39 $\pm$ 0.37  | 3.26 $\pm$ 0.42 |
